# Supplementary material for: Drug sensitivity profiling and molecular characteristics of cells from pleural effusions of patients with lung adenocarcinoma
Source: PubMed Central journal article supplement (PMC4426949; doi:10.18632/genesandcancer.56), 2015-03
Supplement: ganc-06-119-s001.pdf [file ganc-06-119-s001.pdf]

**Drug sensitivity profiling and molecular characteristics of cells from pleural effusions of patients with lung adenocarcinoma**

**Additional file 1: Chemotherapeutic agents used in cytotoxicity assay.**

|                                 |                               |                | <i>In vitro</i> concentrations (µg/ml) |            |
|---------------------------------|-------------------------------|----------------|----------------------------------------|------------|
| <b>Alkylating Agents</b>        | Nitrogen mustard              | Chlorambucil   | 83.3                                   |            |
|                                 |                               | Aziridine      | Mitomycin C                            | 0.3 - 0.6  |
|                                 |                               | Tetrazine      | Dacarbazine                            | 16.7       |
| <b>Platinum drugs</b>           |                               | Cisplatin      | 0.2                                    |            |
|                                 |                               | Carboplatin    | 1.7                                    |            |
|                                 |                               | Oxaliplatin    | 4.2                                    |            |
| <b>Antimetabolites</b>          | Pyrimidine analogues          | Fluorouracil   | 41.7                                   |            |
|                                 |                               | Cytarabine     | 8.3 - 16.7                             |            |
|                                 |                               | Gemcitabine    | 33.3                                   |            |
|                                 | Purine analogues              | Mercaptopurine | 69.4                                   |            |
|                                 |                               | Fludarabine    | 20.8 - 41.7                            |            |
|                                 |                               | Cladribine     | 0.8                                    |            |
|                                 | <b>Antimicrotubule agents</b> | Antifolates    | Methotrexate                           | 4.2 - 20.8 |
| Pemetrexed                      |                               |                | 20.8                                   |            |
| Other                           |                               | Hydroxyurea    | 41.7                                   |            |
|                                 |                               | Taxanes        | Paclitaxel                             | 3.3        |
|                                 |                               |                | Docetaxel                              | 8.3        |
| <b>Topoisomerase inhibitors</b> | Vinca alkaloids               | Vinblastine    | 0.8 - 8.3                              |            |
|                                 |                               | Vincristine    | 0.2 - 0.8                              |            |
|                                 |                               | Vinorelbine    | 1.7 - 8.3                              |            |
|                                 | Type I                        | Topotecan      | 0.2 - 1.7                              |            |
|                                 |                               | Irinotecan     | 16.7                                   |            |
|                                 | Type II                       | Etoposide      | 16.7                                   |            |
|                                 |                               | Amsacrine      | 4.2                                    |            |
| <b>Proteasome inhibitor</b>     |                               | Bortezomib     | 2.9                                    |            |
| <b>Multifunctional drugs</b>    | Anthracycline                 | Daunorubicin   | 4.2 - 16.7                             |            |
|                                 |                               | Doxorubicin    | 0.8 - 1.7                              |            |
|                                 |                               | Epirubicin     | 1.7                                    |            |
|                                 | Other                         | Actinomycin D  | 0.1 - 0.4                              |            |
|                                 |                               | Bleomycin      | 2.5 - 12.5*                            |            |
| <b>Enzyme</b>                   |                               | Asparaginase   | 0.6 - 8.3*                             |            |
| <b>Corticosteroid</b>           |                               | Prednisolone   | 16.7 - 20.8                            |            |

Drugs are divided according to their mechanism of action. \* = IU/ml.

**Additional file 2: Antibodies used in these experiments.**

| Target                                        | Abbreviation | Antibody                          | Dilution | Supplier | Product code   |
|-----------------------------------------------|--------------|-----------------------------------|----------|----------|----------------|
| Epithelial cell adhesion molecule             | EpCAM        | Mouse monoclonal                  | 1:1000   | 2        | M0804          |
| Calretinin                                    |              | Mouse monoclonal                  | 1:100    | 2        | M7245          |
| Thyroid transcription factor-1                | TTF-1        | Mouse monoclonal                  | 1:100    | 2        | M3575          |
| Napsin A                                      |              | Mouse monoclonal                  | 1:200    | 1        | NCL-L-Napsin A |
| Leukocyte common antigen                      | CD45         | Mouse monoclonal                  | 1:400    | 1        | NCL-LCA        |
| Excision repair cross-complementation group 1 | ERCC1        | Mouse monoclonal Ab-2 (clone 8F1) | 1:200    | 3        | MS-671         |
| Ribonucleotide reductase M1                   | RRM1         | Rabbit polyclonal                 | 1:50     | 4        | Ab81085        |

Suppliers: 1 = Leica Microsystems GmbH, Wetzlar, 2 = Dako, Glostrup, Denmark, 3 = Thermo Fisher Scientific Inc, Waltham, MA, USA. 4 = Abcam, Cambridge, UK.

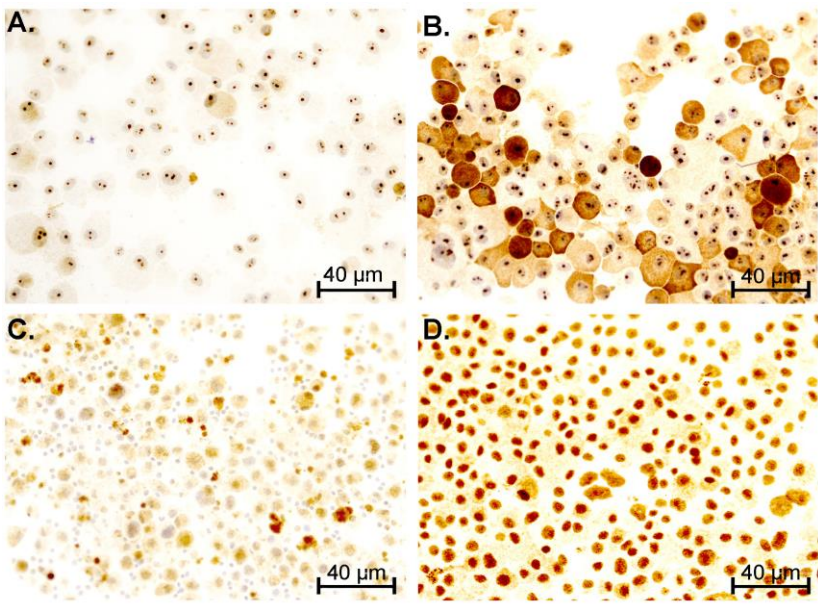

**Additional file 3: RRM1 and ERCC1 immunoreactivity of lung adenocarcinoma cells.** Representative micrographs presenting the RRM1 and ERCC1 immunocytochemical staining's. A: weak RRM1 staining intensity (score 1), B: strong RRM1 staining intensity (score 3), C: weak ERCC1 staining intensity (score 1) and D: strong ERCC1 staining intensity (score 3), respectively. Scale bar = 100  $\mu\text{m}$ .
